# Supplementary material for: Retrogression of ultrahigh-pressure eclogite, Western Gneiss Region, Norway
Source: Copernicus journal article supplement (doi:10.5194/ejm-35-1125-2023), 2023-12-14

Spengler D, Włodek A, Zhong X, Loges A & Cuthbert SJ (2023):  
Retrogression of ultrahigh-pressure eclogite, Western Gneiss Region, Norway.

Supplement, File S1: Scanned thin sections of 10 WGR eclogites (width of view 24 mm).

(a) Korveneset (Otrøy): Orthopyroxene-bearing eclogite M65

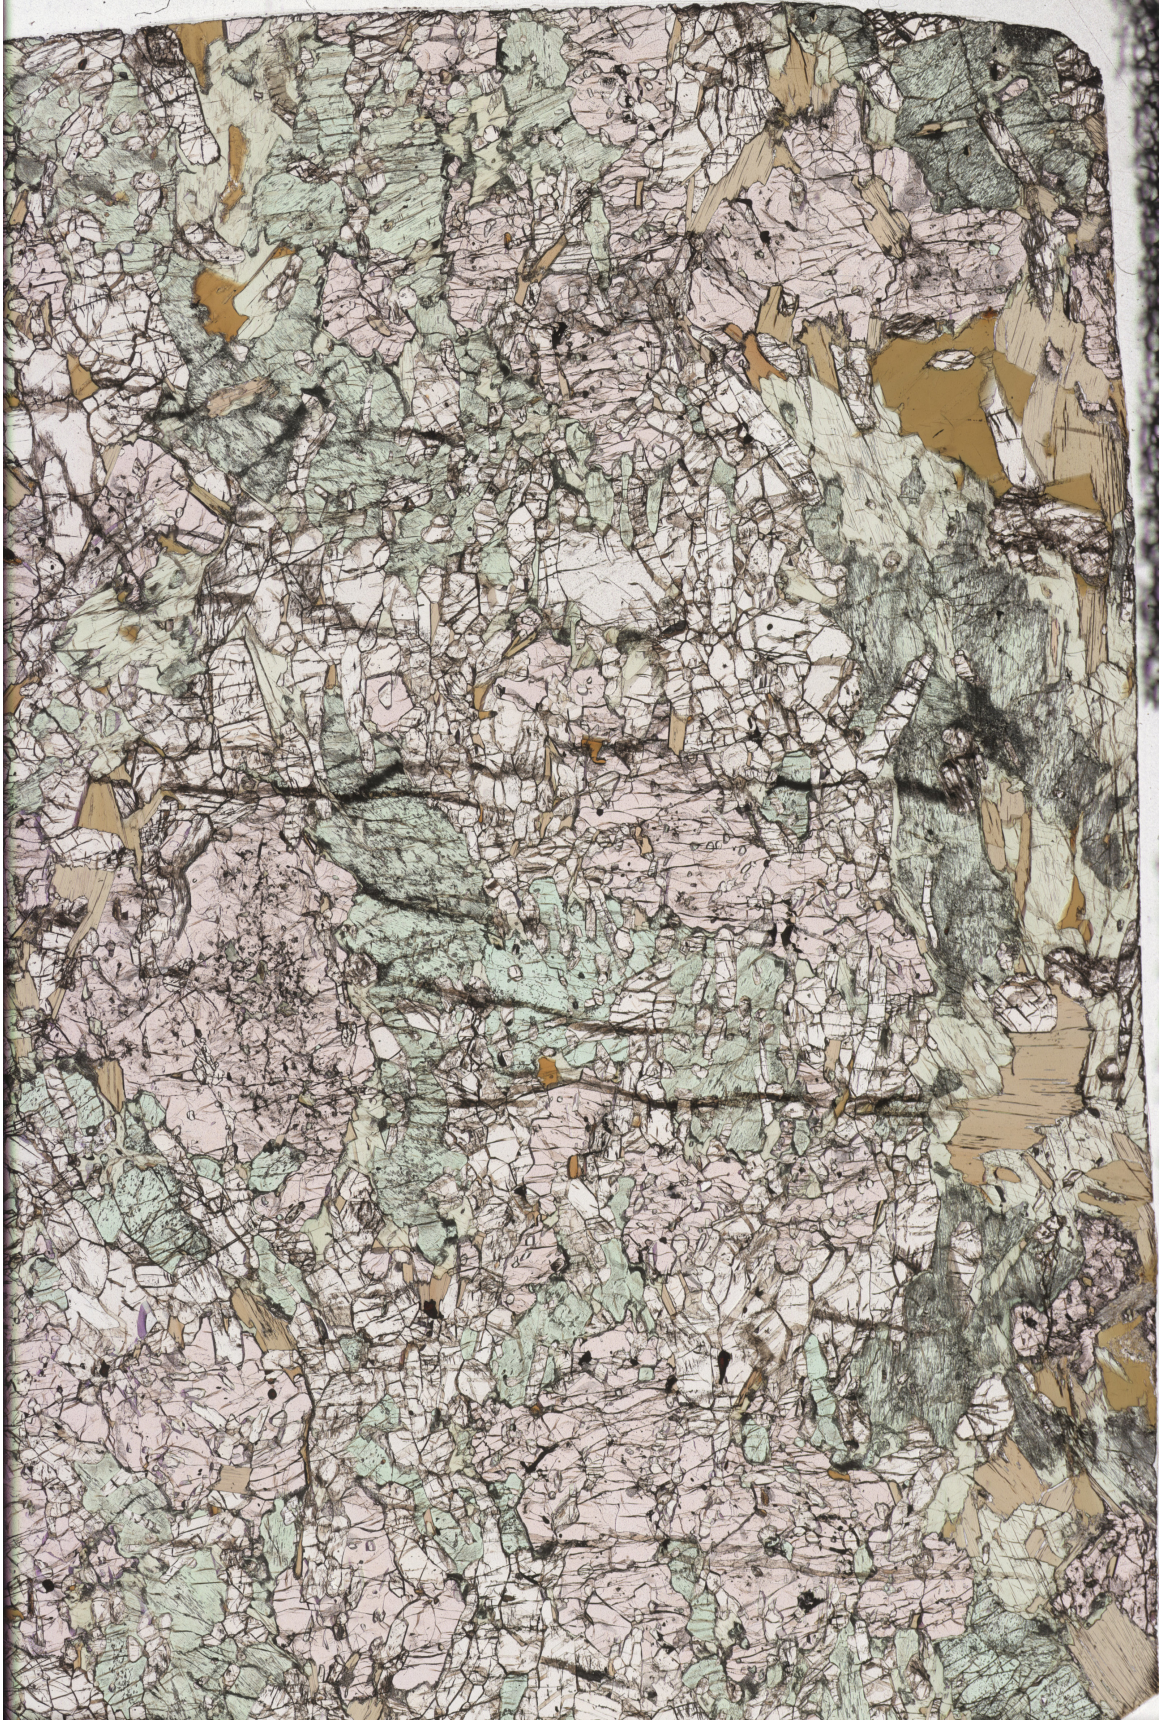



(b) Langeneset (Vigra): Orthopyroxene-bearing eclogite DS2216

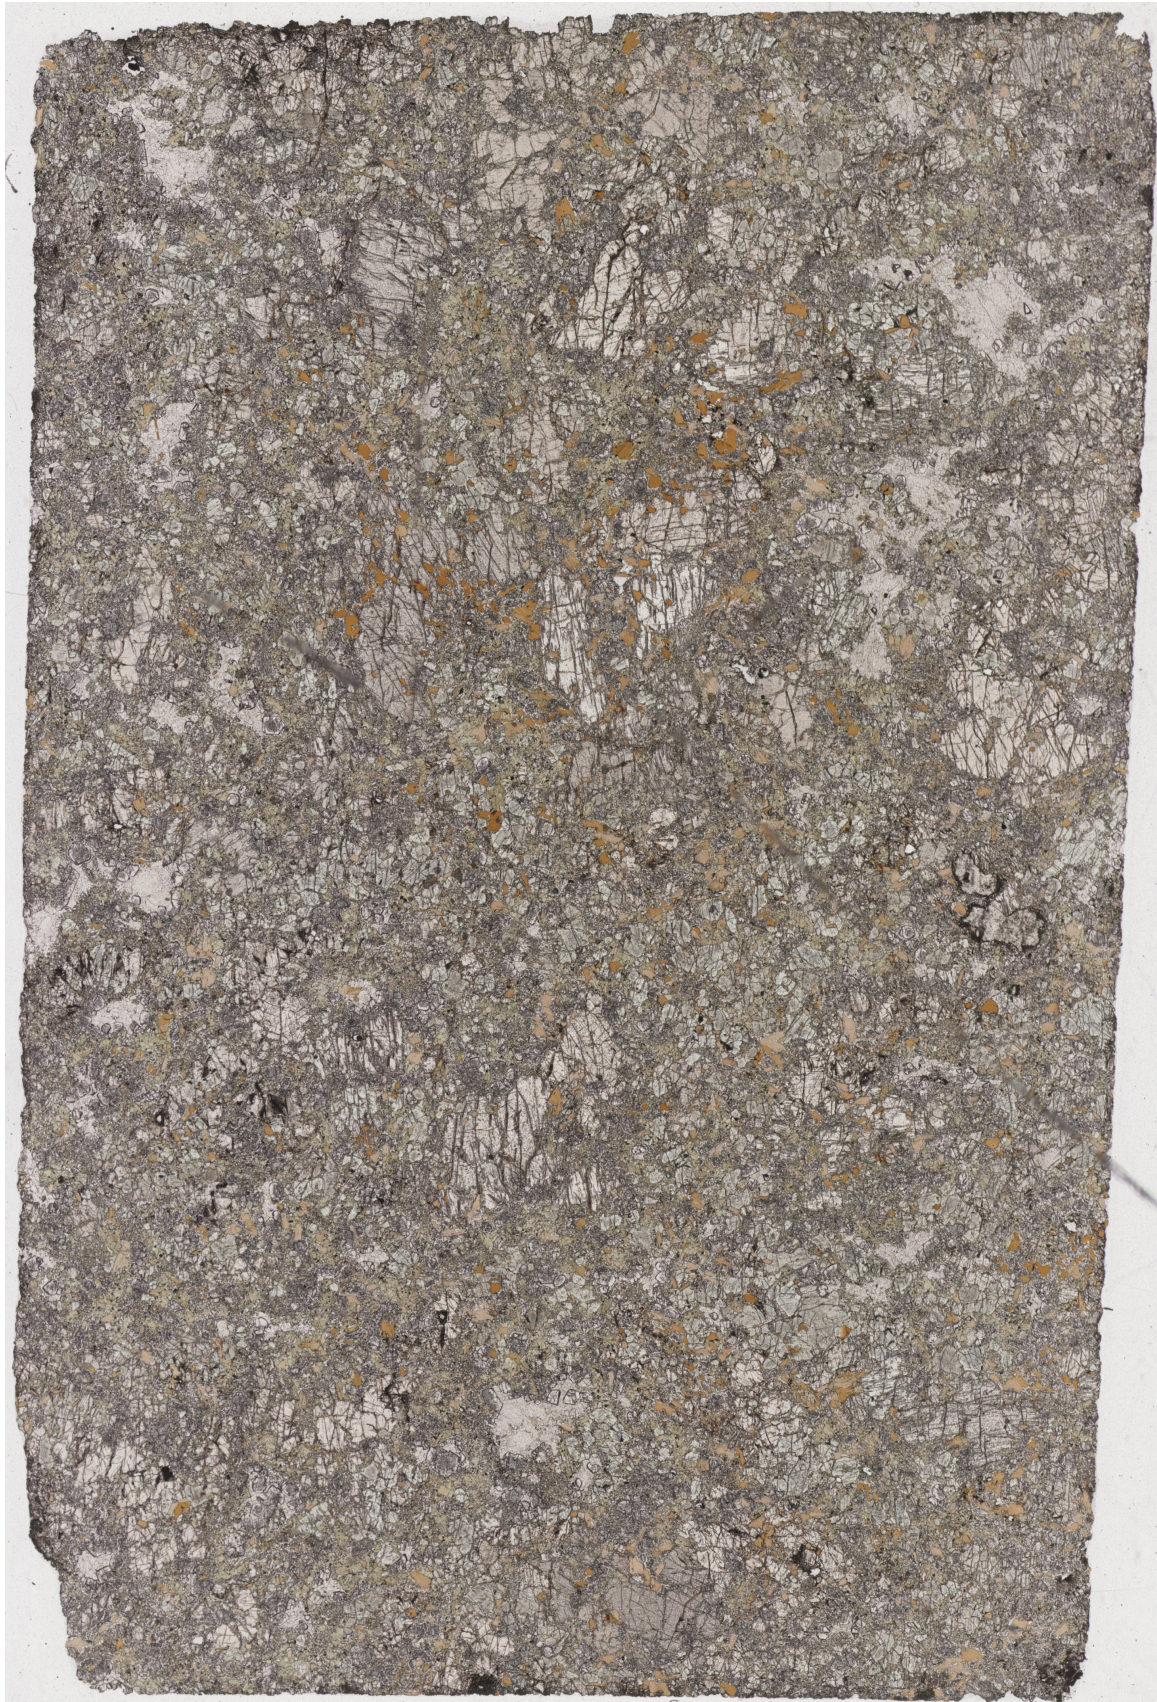



(c) Remøysunde (Remøy): Orthopyroxene-bearing eclogite DS0326

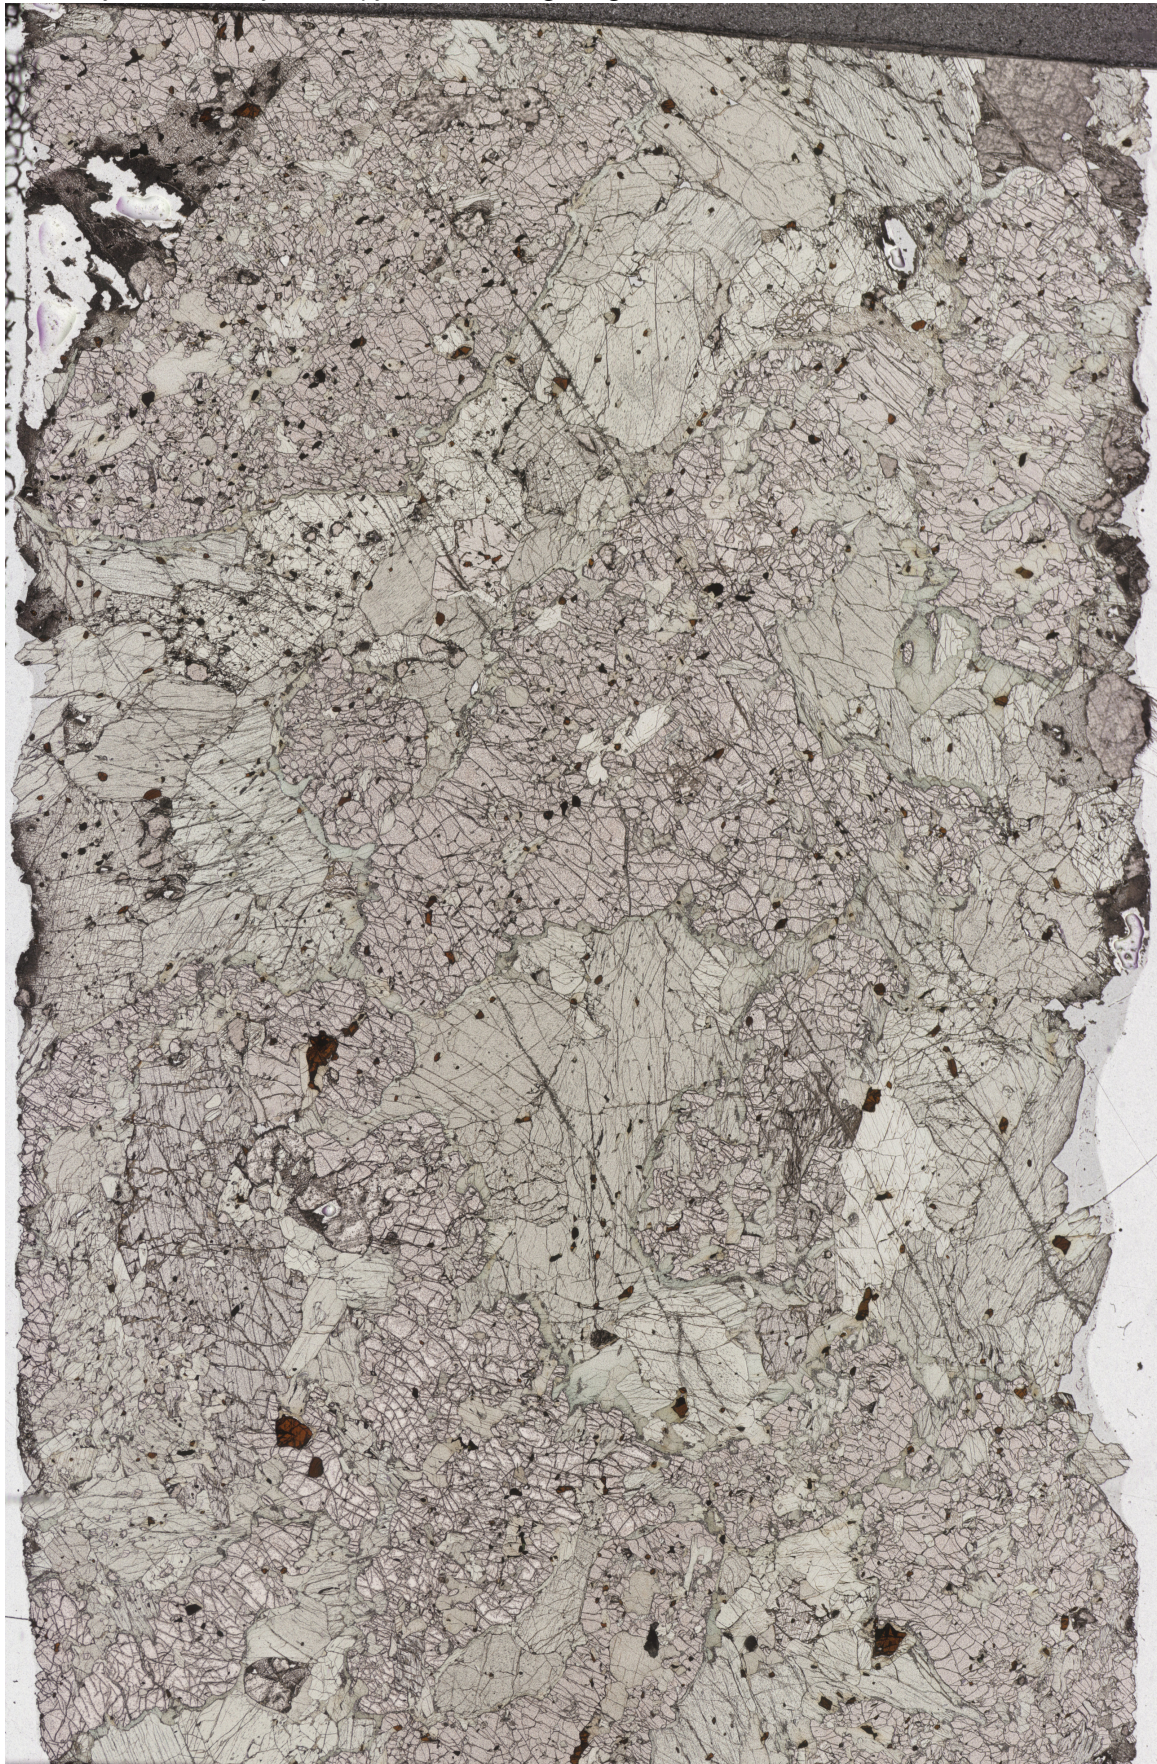



(d) Solholmen (Otrøy): Orthopyroxene-bearing eclogite 2-4A

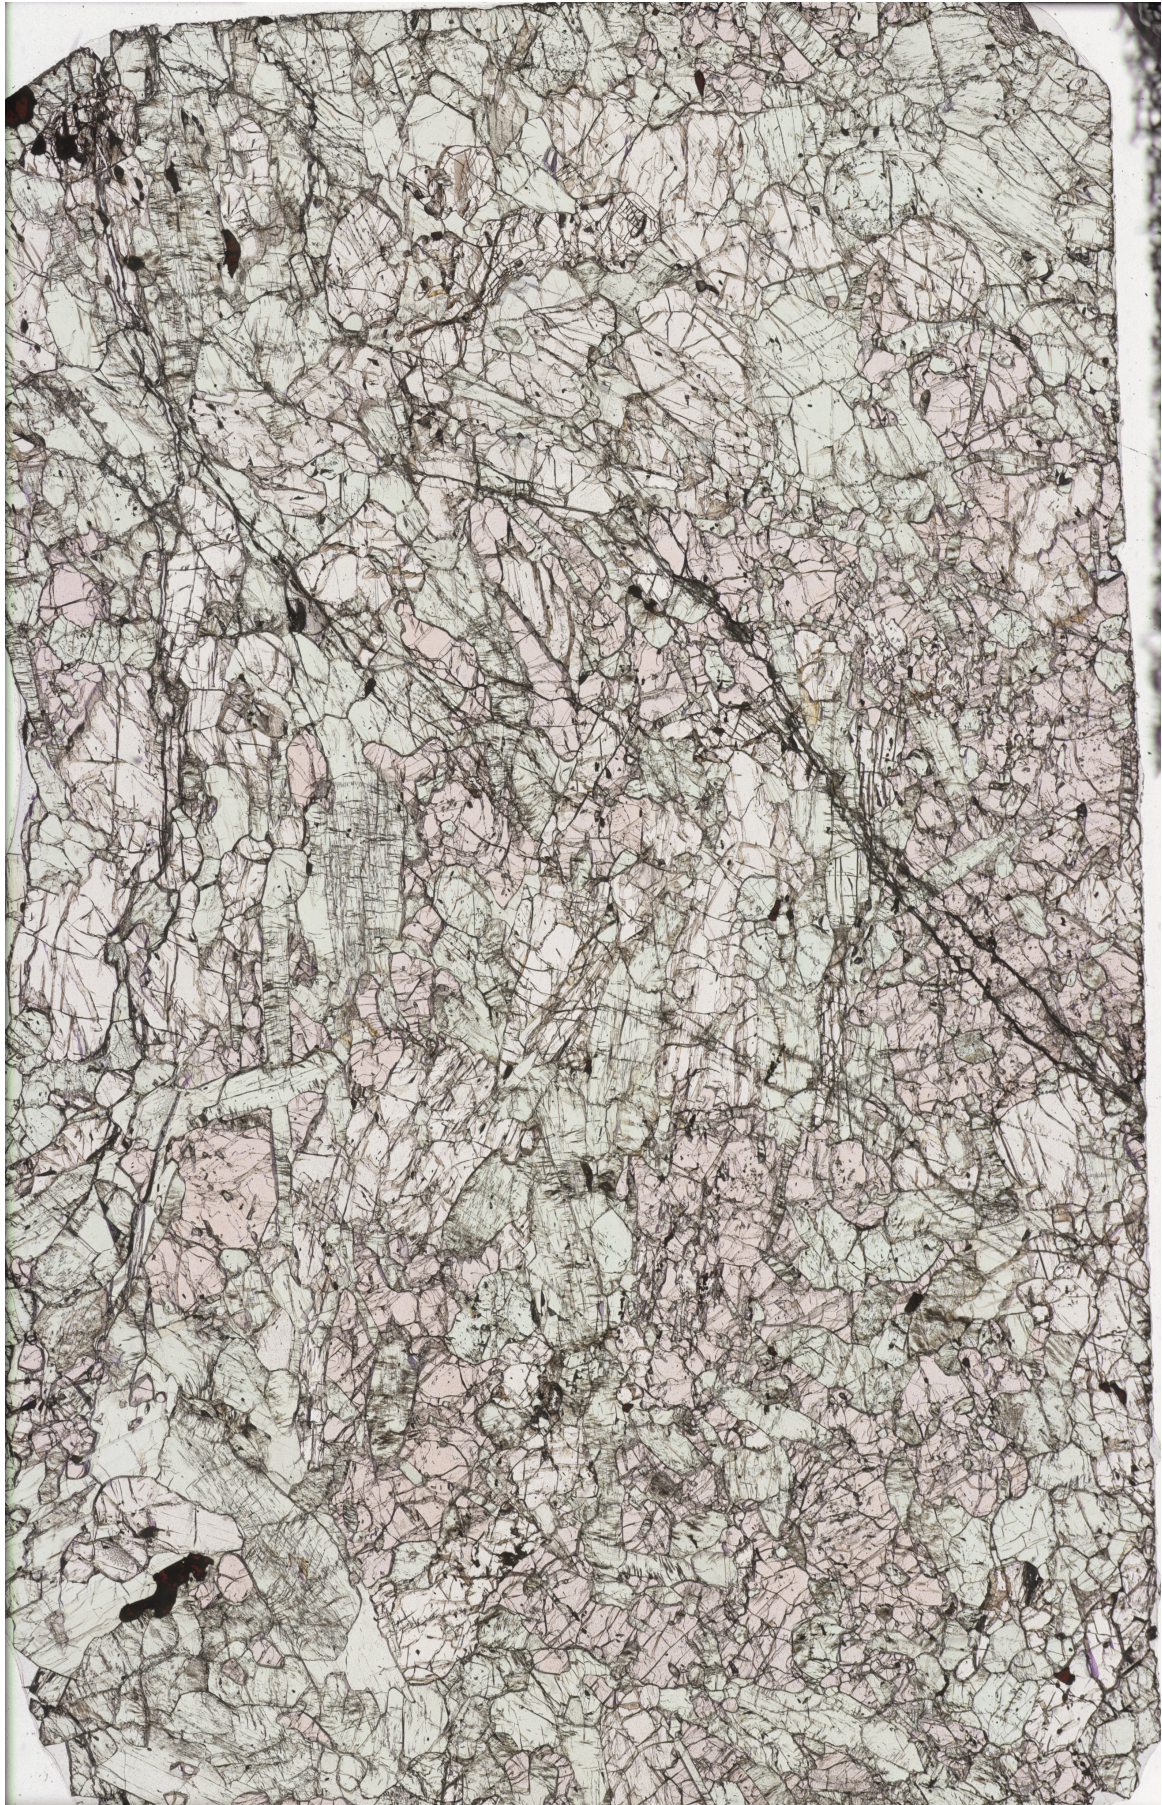



(e) Synes (Vigra): Orthopyroxene-bearing eclogite DS1409

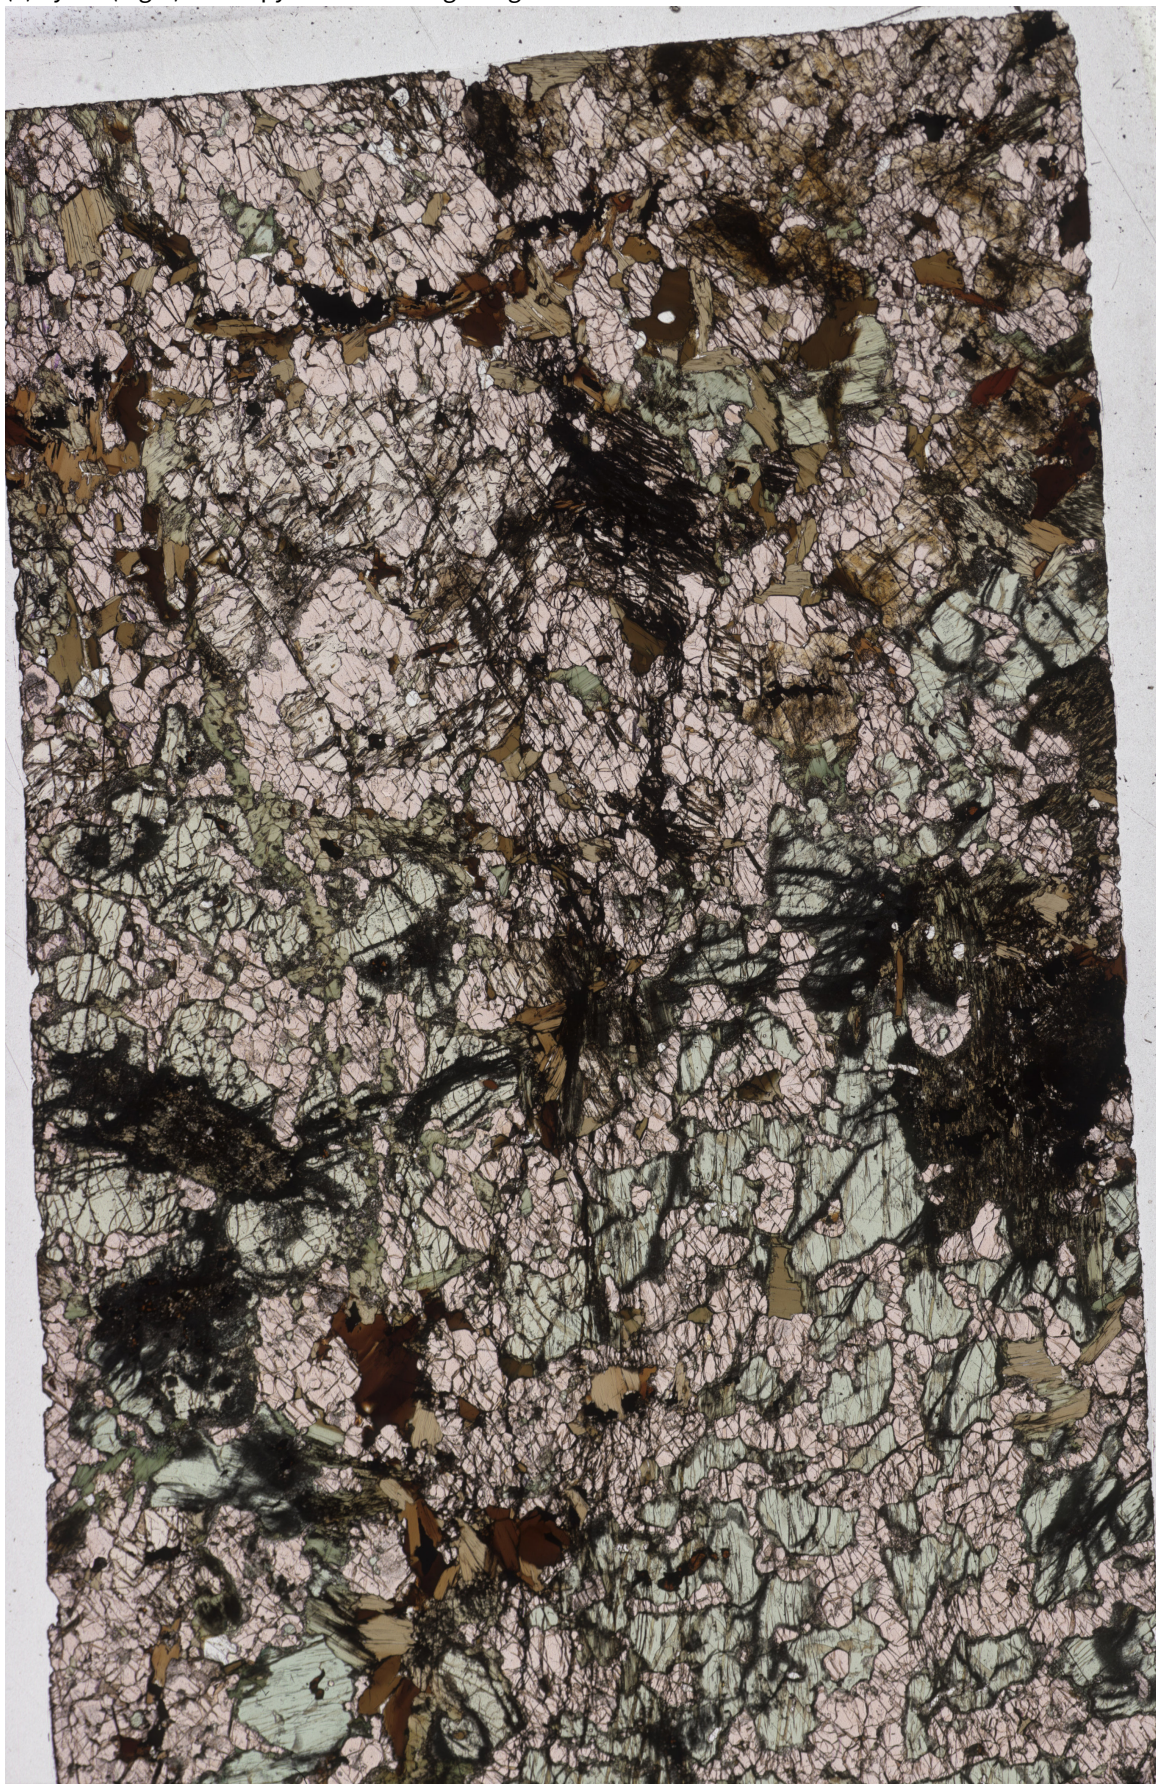



(f) Fjørtoftvika (Fjørtoft): Orthopyroxene-free eclogite DS1438

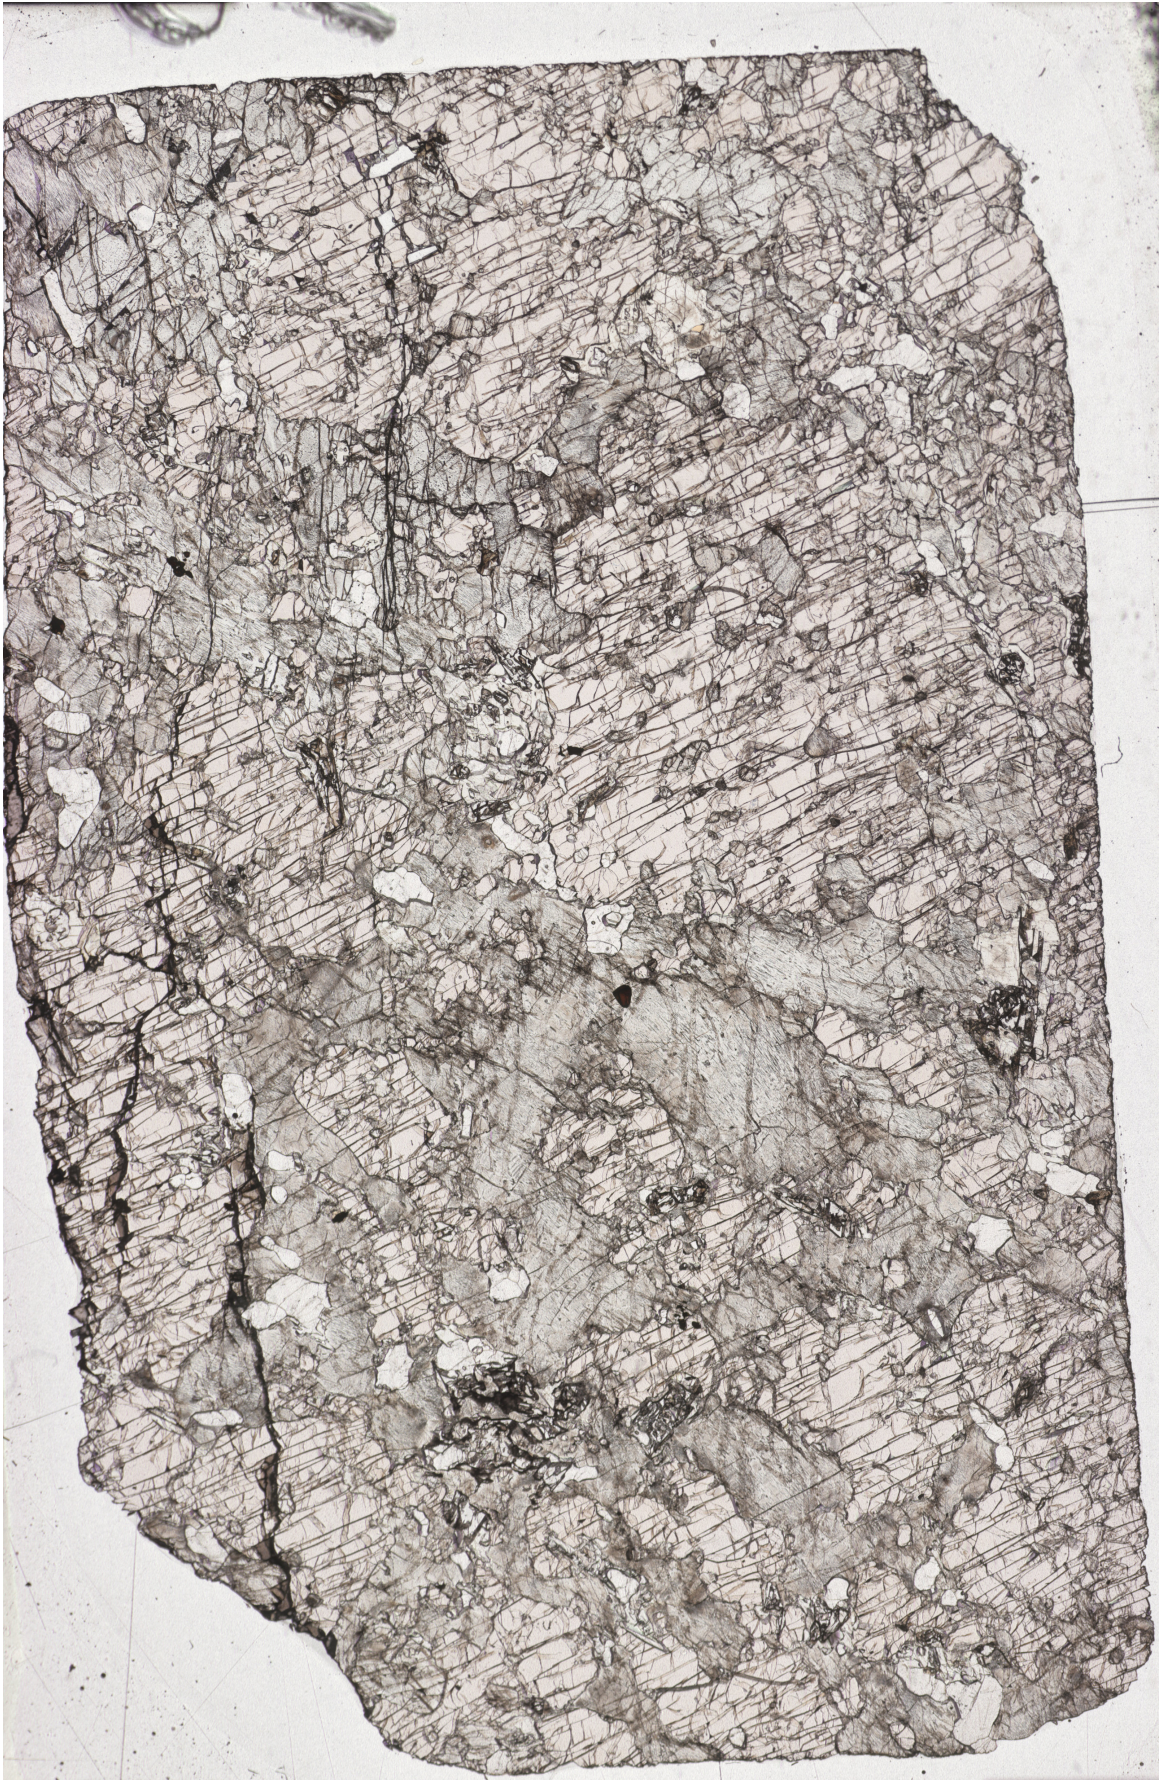



(g) Karmannsvågen (Vigra): Orthopyroxene-free eclogite DS2217

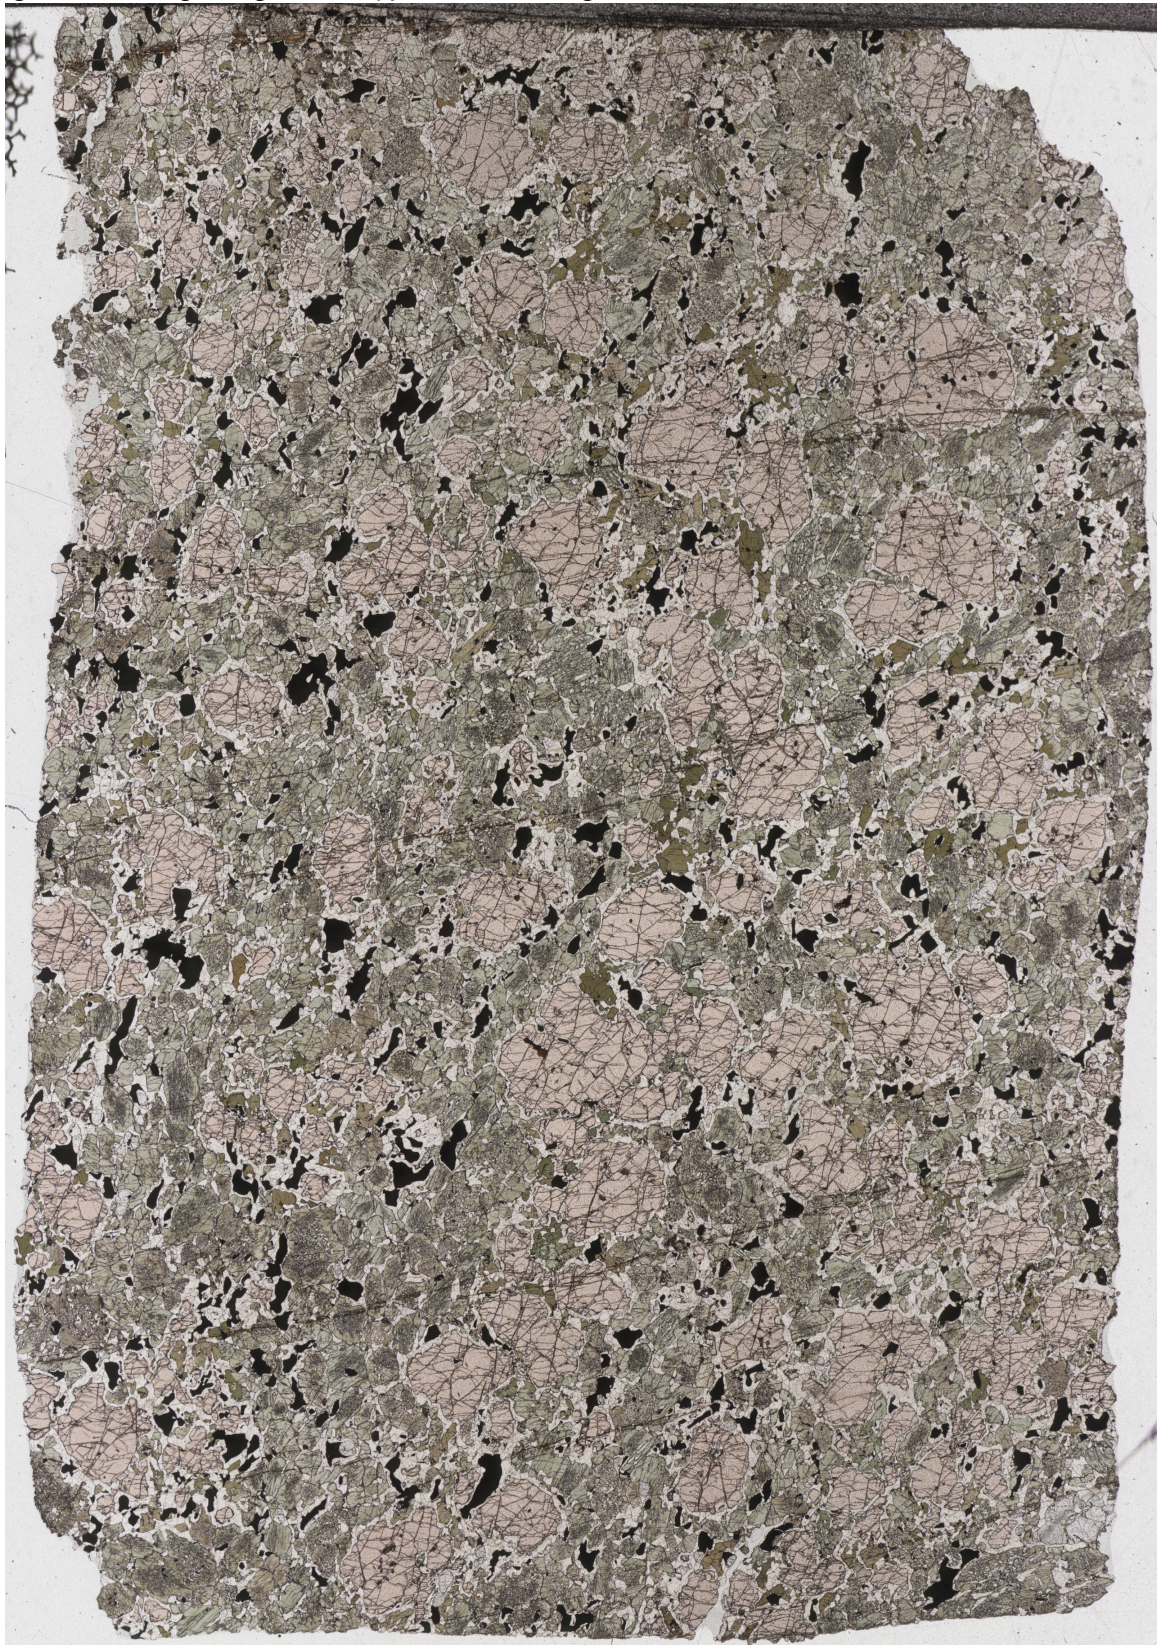



(h) Riksheim (mainland): Orthopyroxene-free eclogite DS1405

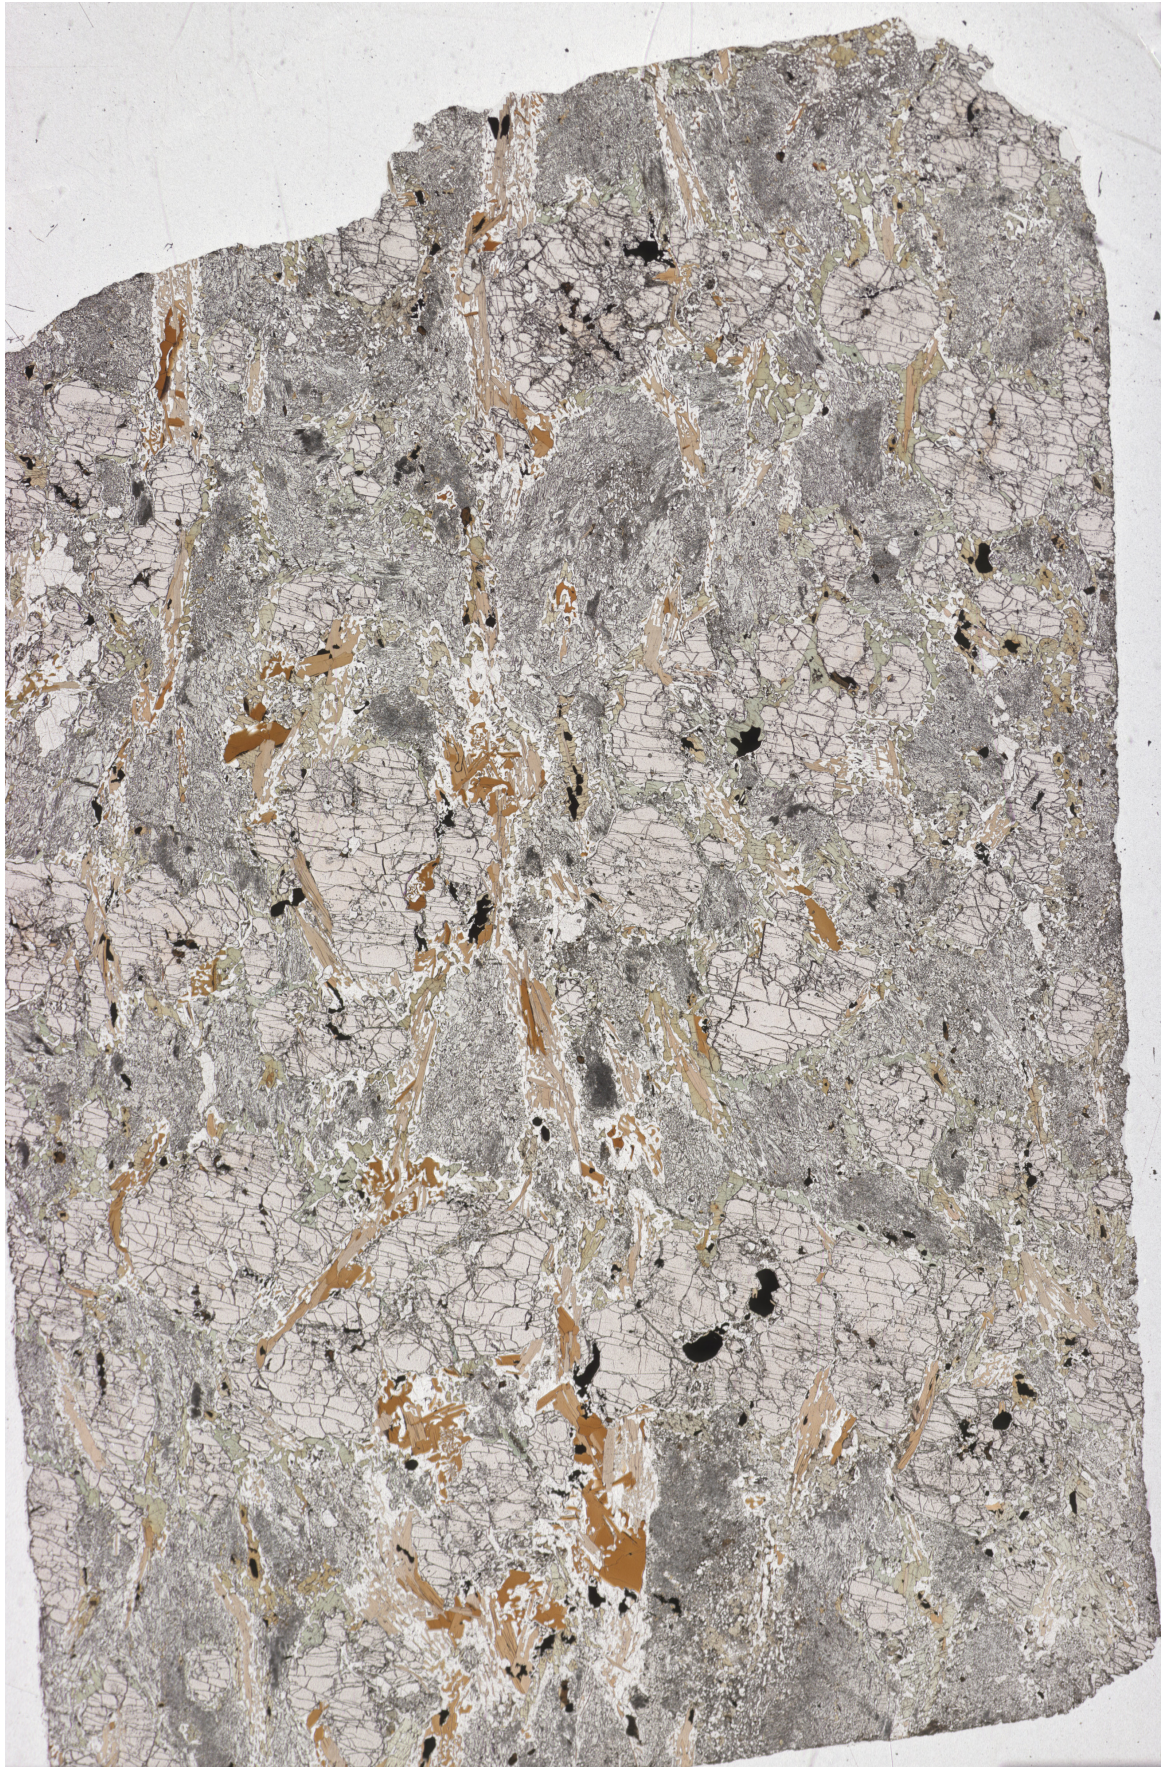



(i) Ulsteinvik (Hareidland): Orthopyroxene-free eclogite UL-96-2

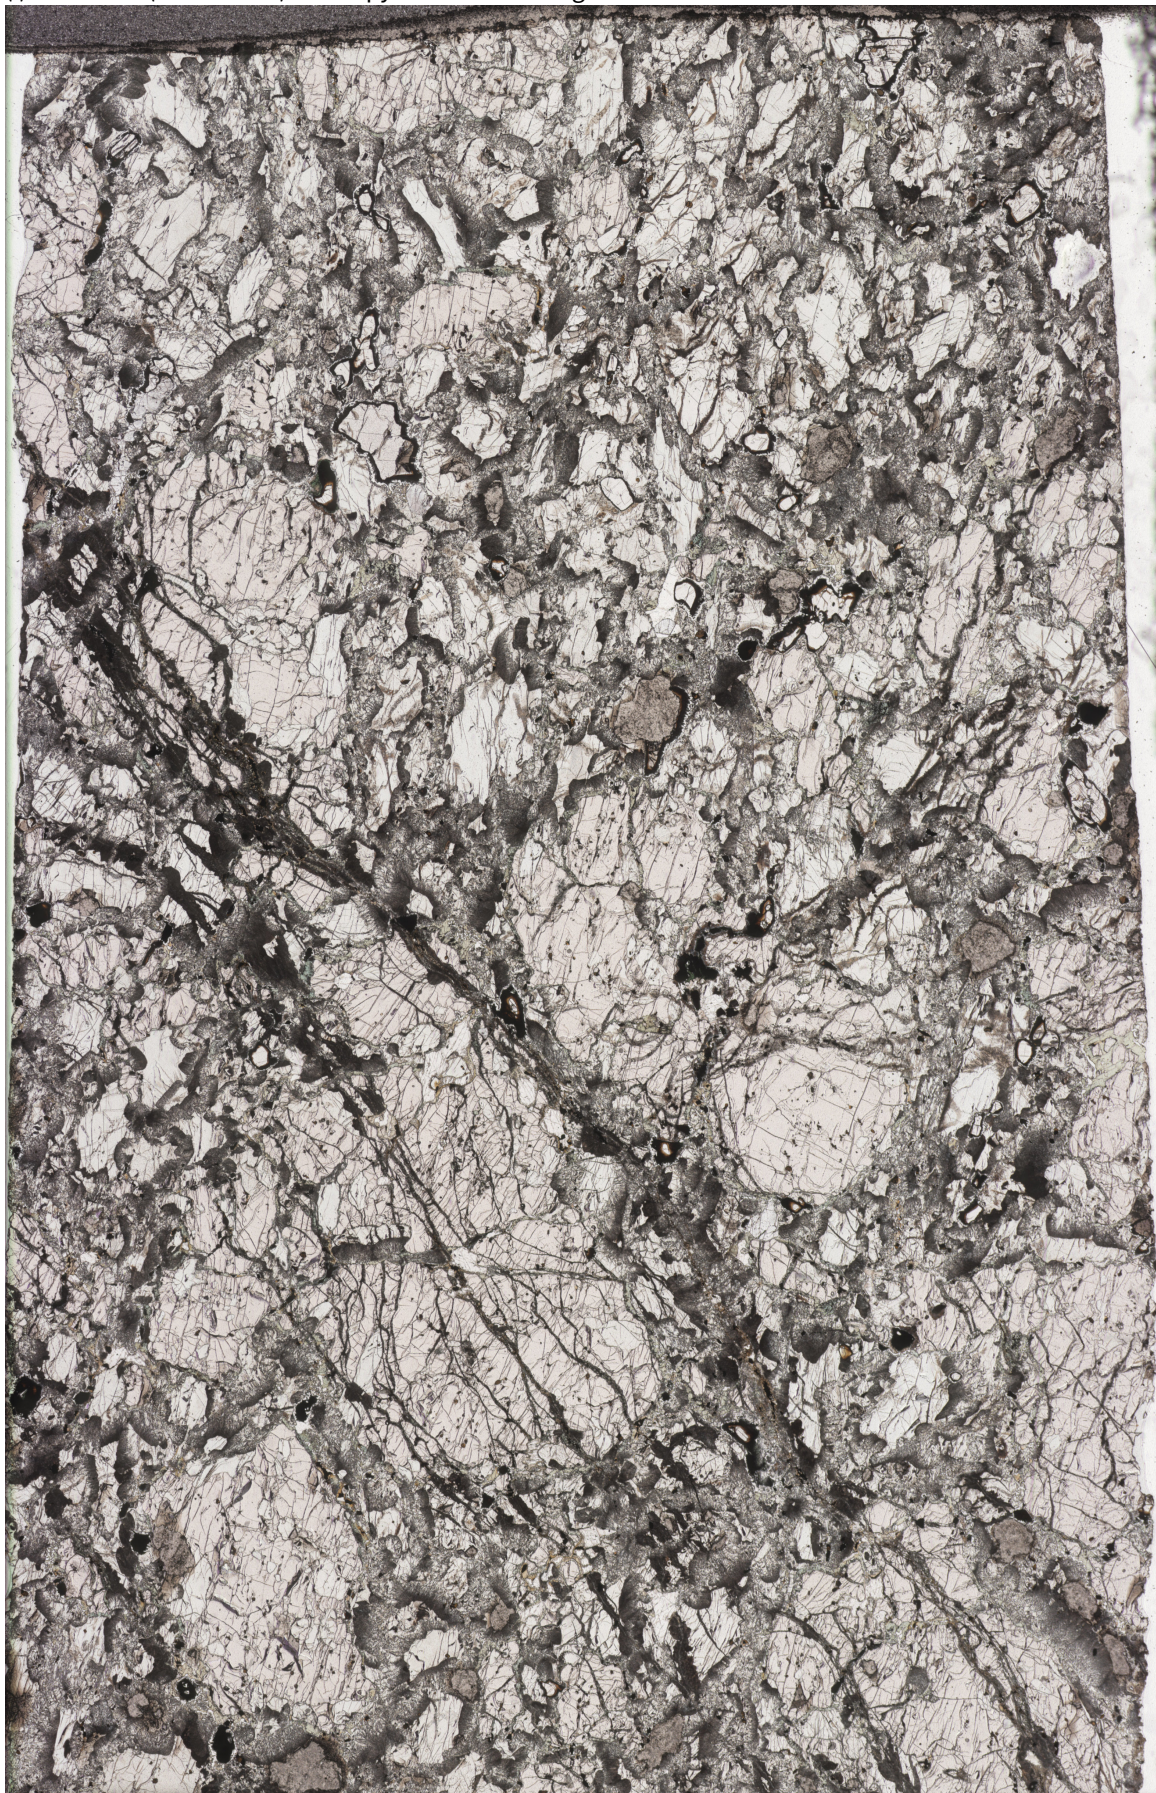



(j) Årsetneset (Ellingsøy): Orthopyroxene-free eclogite DS2204

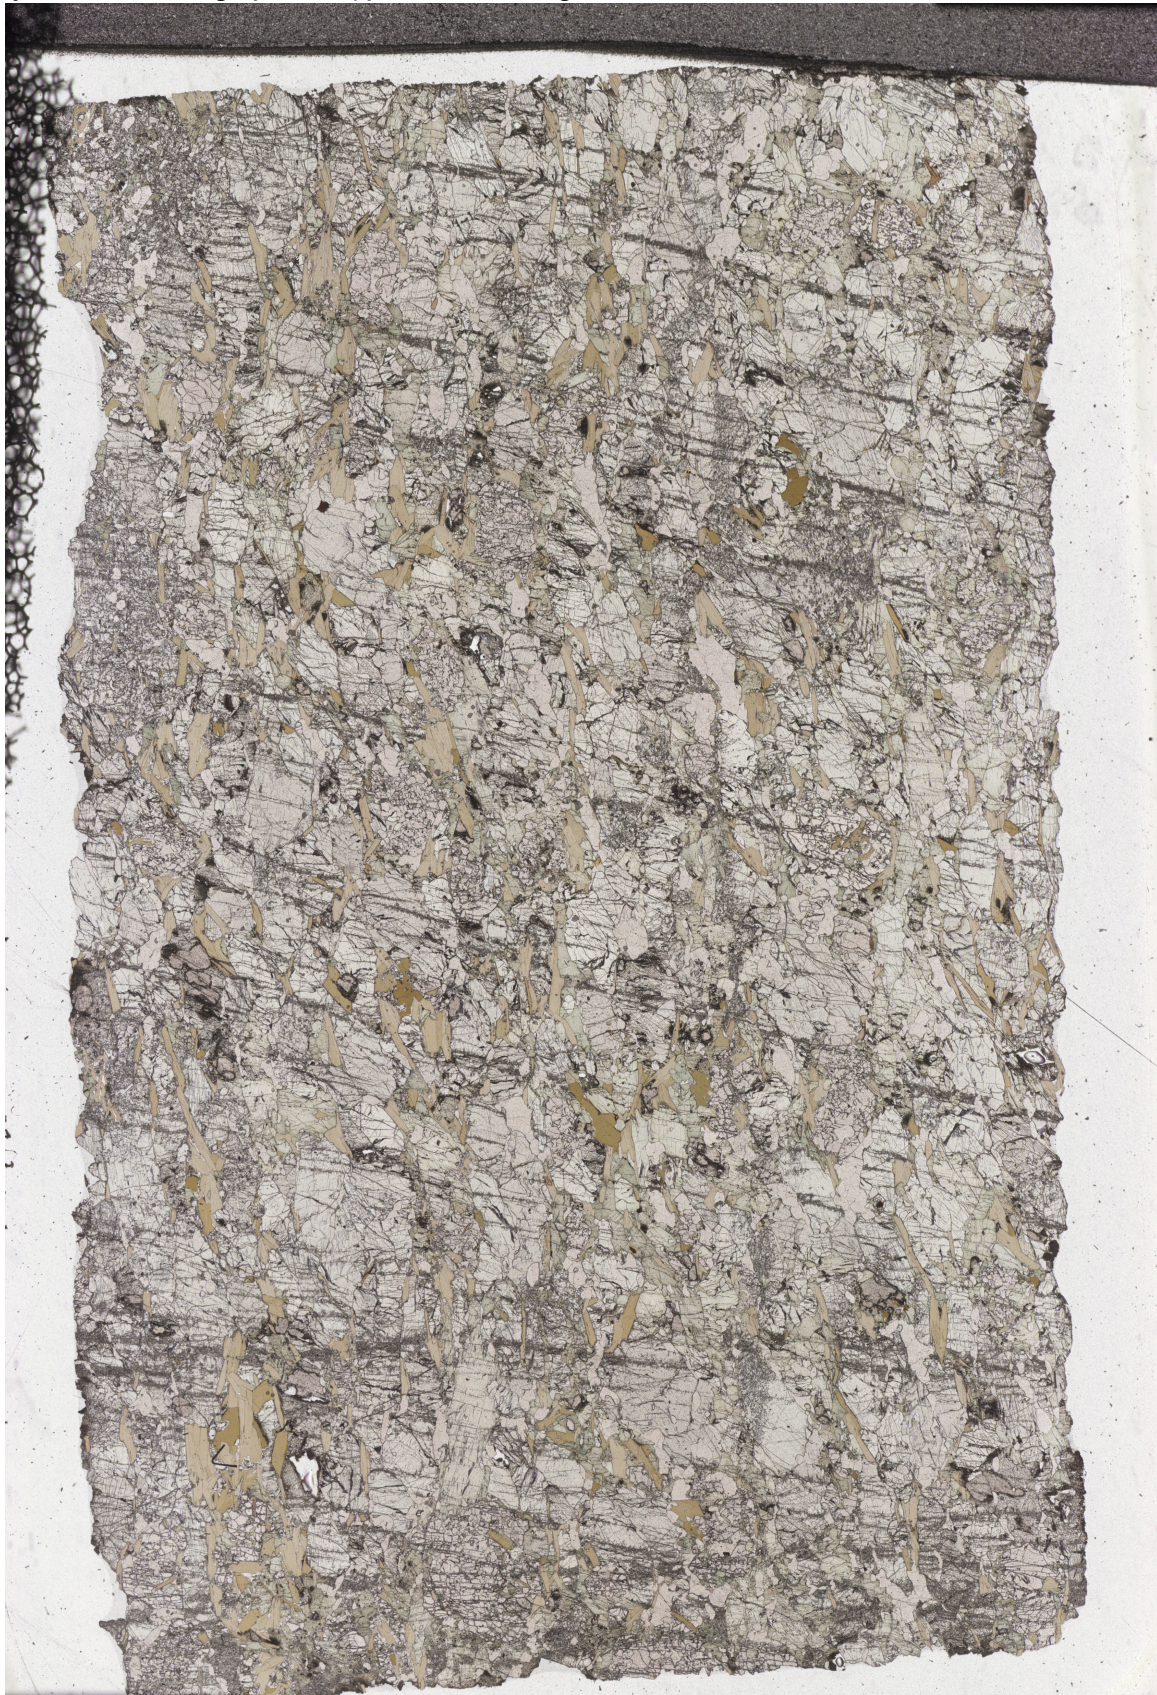

Supplement: Supplementary file 1 [file ejm-35-1125-2023-supplement.zip]
