# Supplementary material for: Retrogression of ultrahigh-pressure eclogite, Western Gneiss Region, Norway
Source: Copernicus journal article supplement (doi:10.5194/ejm-35-1125-2023), 2023-12-14
Supplement: Supplementary file 2 [file ejm-35-1125-2023-supplement.zip]

Archive with 3 entries (3 files):
- WGReclogite_supplement_S2.pdf
- ejm-35-1125-2023-supplement-title-page.pdf
- WGReclogite_supplement_S1.pdf
