# Supplementary material for: Retrogression of ultrahigh-pressure eclogite, Western Gneiss Region, Norway
Source: Copernicus journal article supplement (doi:10.5194/ejm-35-1125-2023), 2023-12-14
Supplement: Supplementary file 2 [file ejm-35-1125-2023-supplement.zip › ejm-35-1125-2023-supplement-title-page.pdf]

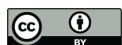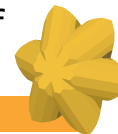

*Supplement of*

**Retrogression of ultrahigh-pressure eclogite, Western Gneiss Region, Norway**

**Dirk Spengler et al.**

*Correspondence to:* Dirk Spengler ([dirk@spengler.eu](mailto:dirk@spengler.eu))

- [ejm-35-1125-2023-supplement-title-page.pdf](#)
- [WGReclogite\\_supplement\\_S1.pdf](#)
- [WGReclogite\\_supplement\\_S2.pdf](#)

The copyright of individual parts of the supplement might differ from the article licence.
