# Supplementary material for: Retrogression of ultrahigh-pressure eclogite, Western Gneiss Region, Norway
Source: Copernicus journal article supplement (doi:10.5194/ejm-35-1125-2023), 2023-12-14

Spengler D, Włodek A, Zhong X, Loges A & Cuthbert SJ (2023):  
Retrogression of ultrahigh-pressure eclogite, Western Gneiss Region, Norway.

Supplement, File S2: Mineral chemical data of sample DS1405.

(a) Compositional maps of a clinopyroxene (Cpx) grain core area that contains oriented inclusions of quartz (Qtz) and albite (Ab) and that has symplectic plagioclase (Pl) at the periphery. Grain boundaries of quartz inclusions are straight, whereas those of albite have irregular shapes. The inclusion labelled Ab is magnified in panel (b).

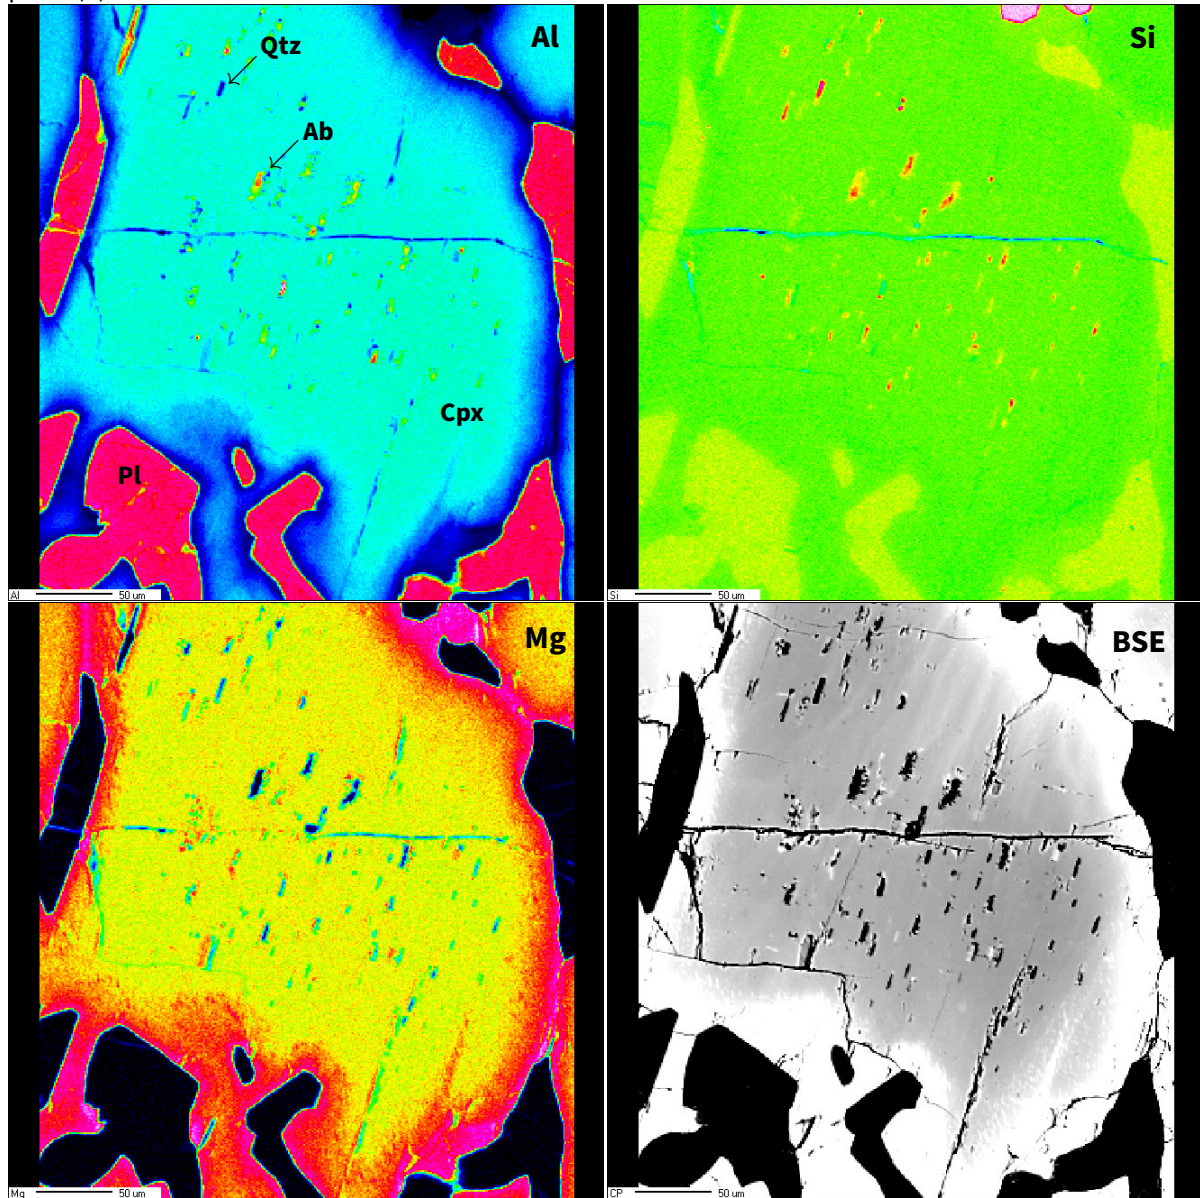

(b) Semi-quantitative compositional data (bottom row) determined from energy dispersive spectra (centre row) obtained in an area with albite inclusions shown in the BSE images (top row). The irregular interface between albite inclusions (black) and host omphacite (gray) has a diopsidic (low-Al clinopyroxene) composition (bright).

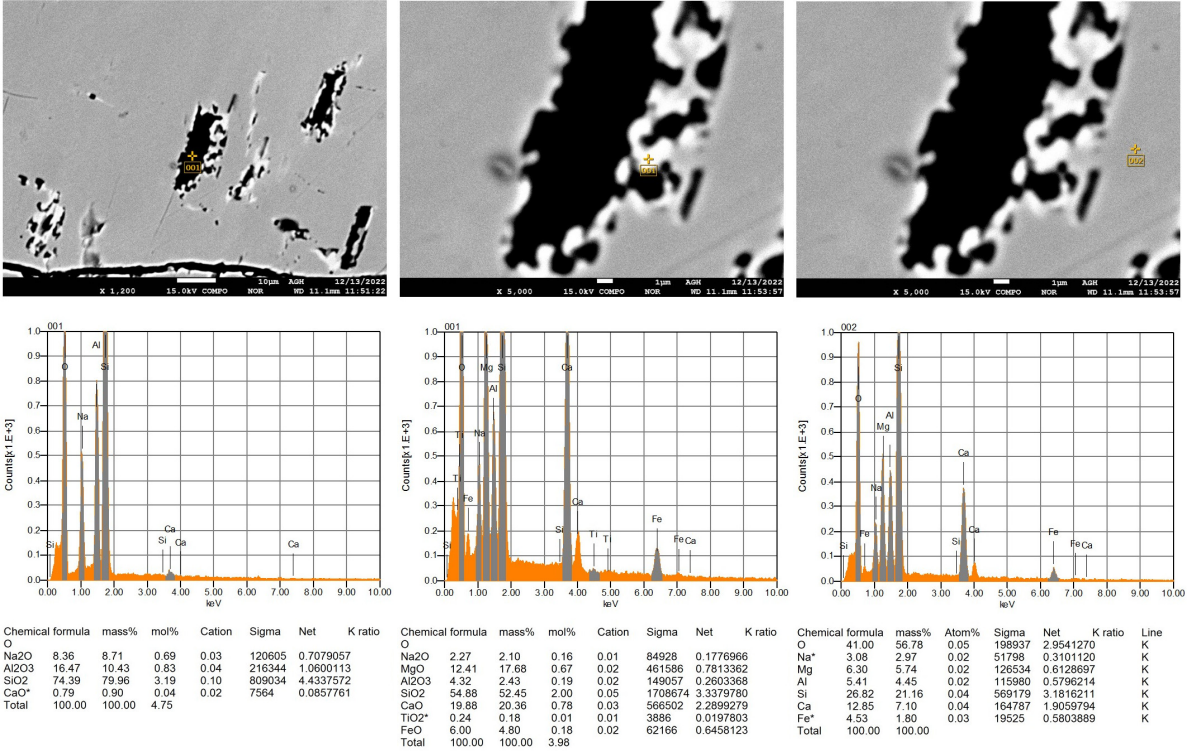

Supplement: Supplementary file 2 [file ejm-35-1125-2023-supplement.zip › WGReclogite_supplement_S2.pdf]
